# Supplementary material for: Ethylene Response Factor MaERF012 Modulates Fruit Ripening by Regulating Chlorophyll Degradation and Softening in Banana
Source: MDPI journal article supplement (doi:10.3390/foods11233882), 2022-12-01
Supplement: s1 [file s1]

## Supplementary Materials

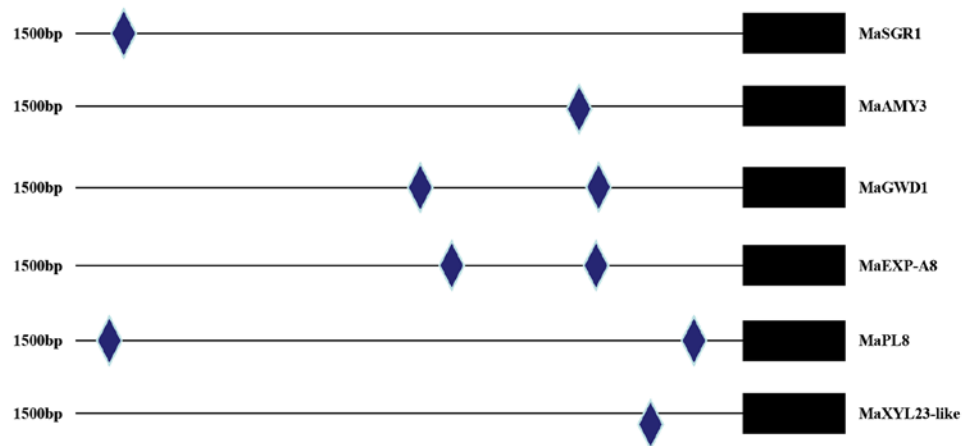

**Figure S1.** Multiple alignment of MaERF012 (XM\_009415777.2) protein with other ERF proteins. Other plants ERF proteins including banana MaERF003 (XP\_009417483.2) and MaERF113 (XP\_018683838.1), tomato SIERF003 (XP\_004242199.1), SIERF014 (XP\_010312777.1), SIERF017 (XP\_004251702.1) and SIERF021 (XP\_004250714.1), papaya CpERF003 (XP\_021906523.1), CpERF113 (XP\_021900277.1), CpERF020 (XP\_021903568.1), CpERF023 (XP\_021893066.1), CpERF024 (XP\_021908529.1), CpERF036 (XP\_021891938.1) and CpERF039 (XP\_021893663.1). The multiple alignments were made using DNAMAN.

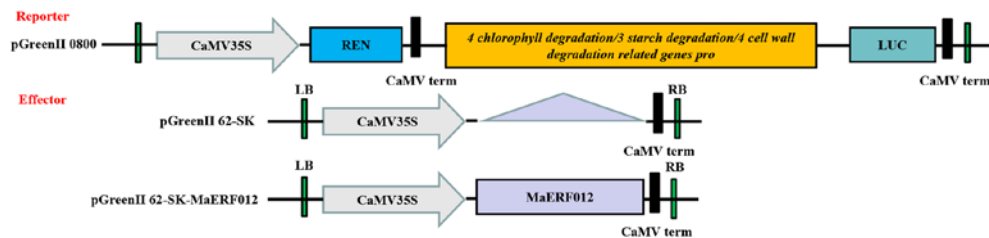

**Figure S2.** Phylogenetic analysis of MaERF012 and other ERF proteins. The phylogenetic tree was performed by MEGA 5.0 with a default parameters, minimum evolution test and bootstrap test of phylogeny. The numbers indicate the bootstrap values.

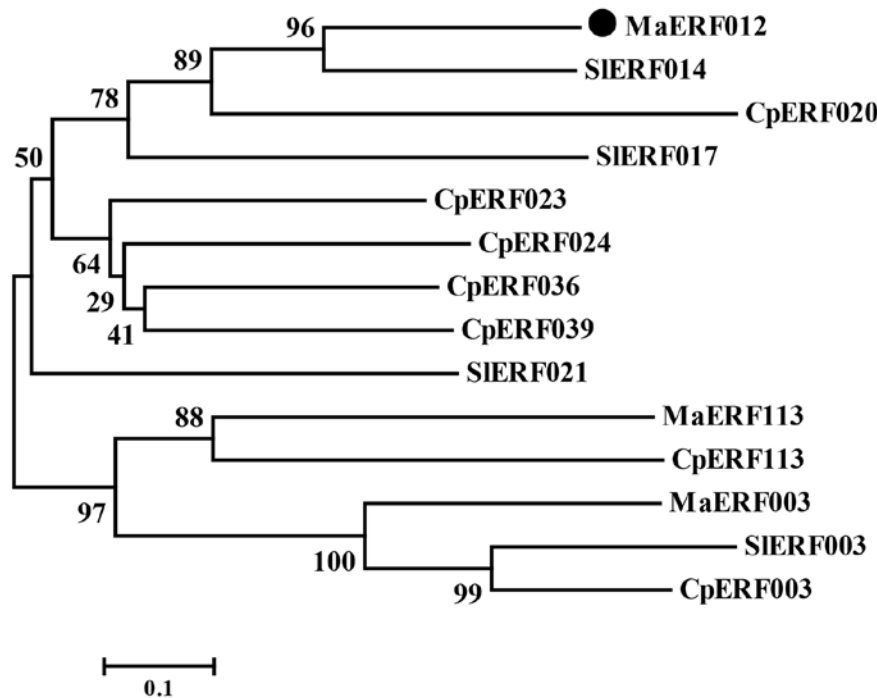

Figure S3. Picture of the effector and reporter vectors.

|              |                                                                                                  |     |
|--------------|--------------------------------------------------------------------------------------------------|-----|
| MaERF003.seq | .....ARRCSLPI LCI GSPAVI SLSSLSSLSLTHTRSCSHVTDAPR.....                                           | 45  |
| MaERF012.seq | .....VVKSKI RG.....ALDHCD..PRSSAAAVGKK.....                                                      | 26  |
| MaERF113.seq | .....VVSALAHVI SSSSSVVDTRGCEPAST CCGI KLEEAAGRGDTAAQVSEI CQNV.....                               | 53  |
| PaERF003.seq | .....MARP.....                                                                                   | 4   |
| PaERF020.seq | .....M.....SNVCAYELADSAHGDHDK.....                                                               | 21  |
| PaERF023.seq | .....MEGPP.....YIEDDS.....TTITITNTIAAEI HSKSSS.....RN                                            | 33  |
| PaERF024.seq | .....M.....CYYSKPT.....NKASSSSSSSSRSNVSS.....                                                    | 25  |
| PaERF036.seq | AKII FTLLTNEKNHTI QI SI KPETPT CNSASSSPPSPSSLPCHDCSPLQI SI I PETAT CNSASSPSPSPSSNPLPKLSEEPKLPRIH | 90  |
| PaERF039.seq | .....MEASF.....HQKCEARS.....IGATSPSSSSSSSTLSSSSI NKSCCKFCFEESIIN                                 | 48  |
| PaERF113.seq | .....VVSALTQVI GTAG.....AHNQAPG.....SSSSSGKEI PCSCPDCS.....                                      | 38  |
| SIERF003.seq | .....MARP.....                                                                                   | 4   |
| SIERF014.seq | .....VVKTECKS.....LSMSI SSI ATSNNNNAKTKN.....                                                    | 29  |
| SIERF017.seq | .....MVKPNSKDTEFSCSSSS.....                                                                      | 17  |
| SIERF021.seq | .....MCGIT S.....                                                                                | 6   |
| MaERF003.seq | .....LCRYGVRGRVGSVSEIRHFLKTRVLGTFGTATDAARANDAAARLACGSKAR..TNFVDPN...C                            | 110 |
| MaERF012.seq | .....CYNGVNRSGVSVSEIRAPNCKTRVLGYSYTFEAAARANDALLCLRGTAAS..LNFP..ASLLQ                             | 90  |
| MaERF113.seq | .....RRRHYGVNRGSPVGVSEIRAPNCKTRVLGTFDTATDAARANDAAARLACGSKAR..LNFPERVQGR..                        | 120 |
| PaERF003.seq | .....CCRYGVRGRVGSVSEIRHFLKTRVLGTFGTATDAARANDAAARLACGSKAR..TNFVDPN...SSS                          | 72  |
| PaERF020.seq | .....KYLGVNRGRVGSVSEIRHFLKTRVLGYSYTFEAAARANDAAARLACGSKAR..TNFVDPN...SSS                          | 88  |
| PaERF023.seq | SGTR.....HPVYGVNRGRVGSVSEIRHFLKTRVLGYSYTFEAAARANDAAARLACGSKAR..LNFP..EEVED                       | 102 |
| PaERF024.seq | VTGR.....HPVYGVNRGRVGSVSEIRHFLKTRVLGYSYTFEAAARANDAAARLACGSKAR..LNFP..NSASS                       | 94  |
| PaERF036.seq | HRSRK.....HPVYGVNRGRVGSVSEIRHFLKTRVLGYSYTFEAAARANDAAARLACGSKAR..LNFP..RLVNL                      | 160 |
| PaERF039.seq | VI NKSKRVKI NKNEEDGKNYSAYGVNRGRVGSVSEIRHFLKTRVLGYSYTFEAAARANDAAARLACGSKAR..LNFP..ELAHQ           | 133 |
| PaERF113.seq | .....MRRHYGVNRGRVGSVSEIRHFLKTRVLGYSYTFEAAARANDAAARLACGSKAR..LNFP..ELVQAG..                       | 105 |
| SIERF003.seq | .....CCRYGVRGRVGSVSEIRHFLKTRVLGYSYTFEAAARANDAAARLACGSKAR..TNFVDPN...SSS                          | 72  |
| SIERF014.seq | .....CYNGVNRSGVSVSEIRAPNCKTRVLGYSYTFEAAARANDALLCLRGTAAS..LNFP..ASLLQ                             | 90  |
| SIERF017.seq | .....SLRYGVNRGRVGSVSEIRHFLKTRVLGYSYTFEAAARANDAAARLACGSKAR..LNFP..ELVQAG..                        | 81  |
| SIERF021.seq | .....KYLGVNRGRVGSVSEIRHFLKTRVLGYSYTFEAAARANDAAARLACGSKAR..LNFP..ELVQAG..                         | 69  |
| AP2/ERF      |                                                                                                  |     |
| MaERF003.seq | SI PAPALSPGLAAKLEKCCSASR.....EEGERVEVVAPVG.....EE.....EEAEVTRVDEEYIEE                            | 163 |
| MaERF012.seq | LPDC...VNSPKSI CRVAAAAT.....NAASPSYSSDTAEETLASSAGDGLAME.....DS.PI DDSI NFEA..                    | 181 |
| MaERF113.seq | TDLGFLVSPGVRCPRPVPLQLPATSYDPLLQVACLLCSREEDLQNVASGLYGGFTIPVSSCTPTTS.....ALGSSCHFLDFSSCS           | 204 |
| PaERF003.seq | SSSSKLLSATLAAKLHKCHMASLCPNKK.....HEEPRYTRFANN.....GNAGKS...SEKNGREESCS...NSCVCLAELEEDHVQ         | 149 |
| PaERF020.seq | CANG...ELSPRSVCRAASDAAMAVDAR.....MNVNGLAPSTITELVVDDESSRNLSYEAASEE.....CVTVGREALSI SVED           | 160 |
| PaERF023.seq | LPRPS...TCTPRDI CAAAAAAS.....VILS...KSDVVSVDGDDDFVREIELP.....ELANGGYRNSCG                        | 163 |
| PaERF024.seq | LPVPE...SNSPRDI CAAAAAALGAA.....NDALSAENARNDENVTITAERSSAVNEFVTEDL.....IFDMNLLVMAELGM             | 169 |
| PaERF036.seq | FPRPS...SLAPRDI CAAAAAAM.....AEFTNLPSSSSSSNDSEIELLEI VCLPNI DG.....SYELCELI MEIER                | 230 |
| PaERF039.seq | LPRPS...SANDRDI CAAAAAAM.....LHCKSGCDEKNRLVNAAPPSPASTVASSDDA.....FADLPDLADVTRCI                  | 200 |
| PaERF113.seq | NTELAFIP...VADITTTATTVYANCNPVDVAD..SCEPVSCVYCCDLLR...YACLLTGVDVLSVYTS.....NIADCPPLPHLS..         | 182 |
| SIERF003.seq | SSSTKYLAAALI AKLCRCQKSLNANNRPDTAKLEDGNDRLSSCGNRGDHGI TRRTVQASVEXPVYKESCTENNNCTEKSLEDHGI EQ       | 162 |
| SIERF014.seq | IDHHTCTTLPKAI CRVAAAATPE CQNVGLV...LSDNNNSTNPTI SS..PPCSSTSSSEDI NDGCLLS.....NI NTFDCESMI EQV    | 178 |
| SIERF017.seq | IRNGR...TATPSEI CAAACFANNTEPELI RVGPBENSLLSSSSSEI FRAEPPSVSVSDRVESEKTEI TLGNDFI DVYRVE SRVESEKTE | 169 |
| SIERF021.seq | FPPKA...SSSPEDI RLAAQCAAI T.....VQNTNSASSSBGCGAPVTVGLSPTIEI QAI N..DF.....PADSPHMTTEEDIN         | 139 |
| MaERF003.seq | MEELLI YNGSLIEI TSSSSSSS.....SSSSSSSSYL.....                                                     | 194 |
| MaERF012.seq | FFCSPECRDYMNLPLFAF...CAEIVGEE...ADIHLVSFC.....                                                   | 188 |
| MaERF113.seq | CYTNFSSSSSSSSSSSVHCE...CKDKGSRPP.....                                                            | 235 |
| PaERF003.seq | MEELLDVGSNELCVTST.....                                                                           | 168 |
| PaERF020.seq | VF...VSFGVSVLDGDNCPN.....YSACL.....                                                              | 162 |
| PaERF023.seq | LVSPPLRDI ADDDAAT.....ADHDLVKFP.....                                                             | 187 |
| PaERF024.seq | VVYPPLDF CREFSCEIM.....AAERLIRSDFF.....                                                          | 194 |
| PaERF036.seq | DEFVGPSSVCVTDGPGI DI G.....FNYHDEELFPVVCYCH.....                                                 | 259 |
| PaERF039.seq | .....SSSSSSCHNCDCGCK.....SFDDDNPAH.....                                                          | 237 |
| PaERF113.seq | MEELLDVGSIELSSVLCE.....                                                                          | 208 |
| SIERF003.seq | YNFDPKYNL..ALHGTI FDDPPSAEEVYVESSADI PLVSFC.....                                                 | 181 |
| SIERF014.seq | NSLDNGFVDAFSSSLGTUNDSDFI FPGFDDLSCEFFI PPPSSPQSPICQPNLESLEENLYNDVGCSCQTSFLVN                     | 219 |
| SIERF017.seq | YTYENSVDYEMDDCLVDY.....SSTNSF.....                                                               | 247 |
| SIERF021.seq | .....                                                                                            | 163 |

**Figure S4.** The location of GCC box motifs in the promoters of 3 Chl degradation, 3 starch and 4 cell wall degradation genes.

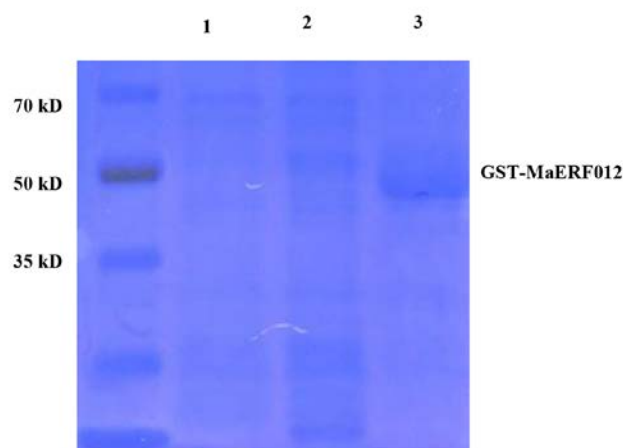

**Figure S5.** The recombinant proteins of GST-MaERF012 was tested by SDS-PAGE gel stained. In lane 1-3: non-induced protein, before purification of the induced protein, after purification of the induced protein.

**Table S1.** Primers used in the present study.

| Experiment                 | Gene                  | Forward primer (5'-3')                      |
|----------------------------|-----------------------|---------------------------------------------|
| RT-qPCR                    | <i>MaERF012-F</i>     | AGACCTTCTTCCAGTCACCCA                       |
|                            | <i>MaERF012-R</i>     | GAGCAATCTACTTGACTTCCACC                     |
|                            | <i>MaSGR1-F</i>       | GGAACAAGGTCCAAGGAAAGA                       |
|                            | <i>MaSGR1-R</i>       | GGAGTTCATCGCAGAAGATGTA                      |
|                            | <i>MaGWD1-F</i>       | GTGTAAAGGGAGAGGAGGAAATAC                    |
|                            | <i>MaGWD1-R</i>       | CTCGCACAGAGACATGAGATAG                      |
|                            | <i>MaAMY3-F</i>       | AGGAACAGGCTCTGGGTATG                        |
|                            | <i>MaAMY3-R</i>       | AGACTCAGTGGGTGGTGGTA                        |
|                            | <i>MaPL8-F</i>        | AGGTTCTCACAGGTTGTGT                         |
|                            | <i>MaPL8-R</i>        | TCTCTTCCAAGGAAGCATCG                        |
|                            | <i>MaEXP-A8-F</i>     | GCTCTGGGAGATGATTGGATT                       |
|                            | <i>MaEXP-A8-R</i>     | CGTCGGTGATACAAGTTCTGATA                     |
|                            | <i>MaXYL23-like-F</i> | GTCACCGCTACTACCTATCT                        |
|                            | <i>MaXYL23-like-R</i> | TTGGTGTGCAGAGTGTAAAGG                       |
| Subcellular location       | ERF012-like-GFP-F     | ATCAAGCTTGGATCCATGGTGAAGAGCAAGATCAG         |
|                            | ERF012-like-GFP-R     | GCTCACCATGTCGACGCAGAAGCTCCACAG              |
| Transient expression assay | MaERF012-like-sk-F    | CGCTCTAGAACTAGTGGATCCATGGTGAAGAGCAAGATCAG   |
|                            | MaERF012-like-sk-R    | GATAAGCTTGATATCGAATTCTCAGCAGAAGCTCCACAG     |
|                            | MaNOL-0800-F          | CTATAGGGCGAATTGGGTACCATCTATTATTACACATGC     |
|                            | MaNOL-0800-R          | TGTTTTTGGCGTCTTCCATGGGACTAGAATAAGCTTATAT    |
|                            | MaNYC1-0800-F         | CTATAGGGCGAATTGGGTACCAACCGTGAACAATTTGGATGC  |
|                            | MaNYC1-0800-R         | TGTTTTTGGCGTCTTCCATGGGATGCTTGAAATCTGCGCATGT |
|                            | MaSGR1-0800-F         | CTATAGGGCGAATTGGGTACCACTTCTCTTAGCATGAGC     |
|                            | MaSGR1-0800-R         | TGTTTTTGGCGTCTTCCATGGGTACTTAACTTCCGAGGGAT   |

|                            |                      |                                                             |
|----------------------------|----------------------|-------------------------------------------------------------|
|                            | MaPPH-0800-F:        | CTATAGGGCGAATTGGGTACCTGTGAAGGTGCCCTACTG                     |
|                            | MaPPH-0800-R:        | TGTTTTTGGCGTCTTCCATGGCATGATCGTGCGCCCTT                      |
|                            | MaBAM3-0800-F        | CTATAGGGCGAATTGGGTACCATTGCCTCCAGTACCTAACATTACG              |
|                            | MaBAM3-0800-R        | TGTTTTTGGCGTCTTCCATGGCATACTGTCGGAGGCCGGCGA                  |
|                            | MaGWD1-0800-F        | CTATAGGGCGAATTGGGTACCAATGACCCCATTAGATCGGATC                 |
|                            | MaGWD1-0800-R        | TGTTTTTGGCGTCTTCCATGGACTTTCGTGGAGGGACATCC                   |
|                            | MaAMY3-0800-F        | CTATAGGGCGAATTGGGTACCTCCTTCTGCGTTAGCCGTTG                   |
|                            | MaAMY3-0800-R        | TGTTTTTGGCGTCTTCCATGGCGGCGAACGGTGGGGGAGAATC                 |
|                            | MaPL8-0800-F         | CTATAGGGCGAATTGGGTACCTCGTATCACCATTTCGCACCTG                 |
|                            | MaPL8-0800-R         | TGTTTTTGGCGTCTTCCATGGGATGGAGAATGCAGTTGCAAGG                 |
|                            | MaEXP-A8-0800-F      | CTATAGGGCGAATTGGGTACCTAGGACCACTTTCATGCCTACAG                |
|                            | MaEXP-A8-0800-R      | TGTTTTTGGCGTCTTCCATGGGCTGTGAATATTAATGCATACCATC              |
|                            | MaSUR14-like-0800-F  | CTATAGGGCGAATTGGGTACCTTAATGGGCCATTAAACCTTGACAG              |
|                            | MaSUR14-like-0800-R  | TGTTTTTGGCGTCTTCCATGGCTCTTCTTCTCCTCTCTTCAAG                 |
|                            | MaXYL23-like-0800-F  | CTATAGGGCGAATTGGGTACCTCTGGTGTGCGCAAACCTACC                  |
|                            | MaXYL23-like-0800-R  | TGTTTTTGGCGTCTTCCATGGAGGAGAGGAGATGGCAGAAGC                  |
| Y1H                        | MAERF012-LIKE-AD-F   | ATGGCCATGGAGGCCAGTGAATTCATGGTGAAGGCAAGATCAG                 |
|                            | MAERF012-LIKE-AD-R   | TGCAGCTCGAGCTCGATGGATCCCTCAGCAGAAGCTCCACAG                  |
|                            | MASGR1-PABAI-F       | TTGAATTCGAGCTCGGTACCTACTGGCGGCACATACTGGCGGCACATACTGGCGGCACA |
|                            | MASGR1-PABAI-R:      | TGCCTCGAGGTCGACTGTGCCGCCAGTATGTGCCGCCAGTATGTGCCGCCAGTA      |
|                            | MaAMY3-PAbAi-F       | TTGAATTCGAGCTCGGTACCCACAGCCGCCCTCACAGCCGCCCTCACAGCCGCCCT    |
|                            | MaAMY3-PAbAi-R       | ATGCCTCGAGGTCGACAGGGGCGGCTGTGAGGGGCGGCTGTGAGGGGCGGCTGTG     |
|                            | MaGWD1-PAbAi-F       | TTGAATTCGAGCTCGGTACCTGTGGCCGCCATCTGTGGCCGCCATCTGTGGCCGCCATC |
|                            | MaGWD1-PAbAi-R       | ATGCCTCGAGGTCGACGATGGCGGCCACAGATGGCGGCCACAGATGGCGGCCACA     |
|                            | MaEXP-A8-PAbAi-F     | TTGAATTCGAGCTCGGTACCTCCGCGGCATGTTCCGCGGCATGTTCCGCGGCATGT    |
|                            | MaEXP-A8-PAbAi-R     | ATGCCTCGAGGTCGACACATGCCGCCGAACATGCCGCCGAACATGCCGCCGA        |
|                            | MaPL8-PAbAi-F        | TTGAATTCGAGCTCGGTACCCGAGGCGGCTGGACGAGGCGGCTGGACGAGGCGGCTGGA |
|                            | MaPL8-PAbAi-R        | ATGCCTCGAGGTCGACTCCAGCCGCTCGTCCAGCCGCTCGTCCAGCCGCTCG        |
|                            | MaXYL23-like-PAbAi-F | TTGAATTCGAGCTCGGTACCAGGAGCCGCCGAAGGAGCCGCCGAAGGAGCCGCCGA    |
|                            | MaXYL23-like-PAbAi-R | ATGCCTCGAGGTCGACTCGGGCGGCTCCTTCGGGCGGCTCCTTCGGGCGGCTCCT     |
| EMSA                       | MaERF012-like-GST-F  | GGTTCGCGTGGATCCATGGTGAAGAGCAAGATCAG                         |
|                            | MaERF012-like-GST-R  | AGTCACGATGCGGCGCGCAGAAGCTCCACAG                             |
|                            | MaSGR1-probe-F       | ATCATATTTCTGAATTAAGGTACTGGCGGCACATCGATATGGTATC              |
|                            | MaSGR1-probe-R       | GATACCATATCGATGTGCCGCCAGTACCTTAATTCAGAAATATGAT              |
|                            | MaAMY3-probe-F       | CGGACTCACGCCACACCACAGCCGCCCTGACGCAATTAGCGTCGA               |
|                            | MaAMY3-probe-R       | TCGACGCTAATTGCGTCAGGGGCGGCTGTGGTGTGGCGTGAGTCCG              |
|                            | MaGWD1-probe-F       | CTAATCACATGATGGTGTGTGGCCGCCATATTCTCTCCAAGCAACC              |
|                            | MaGWD1-probe-R       | GGTTGCTTGGGAGAGAATGATGGCGGCCACACACCATCATGTGATTAG            |
|                            | MaEXP-A8-probe-F     | GTTGGTTTATAAGGTGCTCCGCGGCATGTGCTGCAGACACGAAGT               |
|                            | MaEXP-A8- probe -R   | ACTTCGTGTCTGCAGCACATGCCGCCGAGCACCTTATGAACCAAC               |
|                            | MaPL8-probe-F        | ATATCTGTGTGCTCTTGCGAGGCGGCTGGACTTTCTCTGCACGCAAT             |
|                            | MaPL8-probe-R        | ATTGCGTGCAGGAAAGTCCAGCCGCTCGCAAGAGCACACAGATAT               |
|                            | MaXYL23-like-probe-F | GGCAATCAGTCGGAGGAGGAGCCGCCGATTTGGTGCATATCATC                |
|                            | MaXYL23-like-probe-R | GATGATAGTGACCAAATCGGGCGGCTCCTCCTCCGACTGATTGCC               |
| Transgenic                 | MaERF012-Pdnor-F     | AAAAAGCAGGCTTCATGGTGAAGAGCAAGATCAG                          |
| Fenjiao<br>banana<br>fruit | MaERF012-Pdnor-R     | CAAGAAAGCTGGGTCTCAGCAGAAGCTCCACAG                           |
